# Supplementary material for: Design and synthesis of self-assembled nonlinear optical multichromophore dendrimers with different acceptors
Source: Royal Society of Chemistry journal article supplement (doi:10.1039/d3nj02328a), 2023-01-01
Supplement: d3nj02328a1.pdf [file d3nj02328a1.pdf]

## Electronic supplementary information (ESI)

### Design and synthesis of self-assembled nonlinear optical multichromophore dendrimers with different acceptor

Zhibei Li,<sup>a</sup> Tongyu Luo,<sup>a</sup> Shuhui Feng,<sup>a</sup> Qi Ye,<sup>a</sup> Ziyun Zheng,<sup>a</sup> Huiyuan Liang,<sup>a</sup> Jianhua Liu,<sup>b</sup> and Fenggang Liu<sup>\*a</sup>

<sup>a</sup>School of Chemistry and Chemical Engineering, Guangzhou University, Guangzhou 510006, P. R. China. E-mail address: [liufg6@gzhu.edu.cn](mailto:liufg6@gzhu.edu.cn)

<sup>b</sup>Huawei Technologies, Bantian Industrial Base, Shenzhen 518129, P. R. China

#### 1. Optical properties

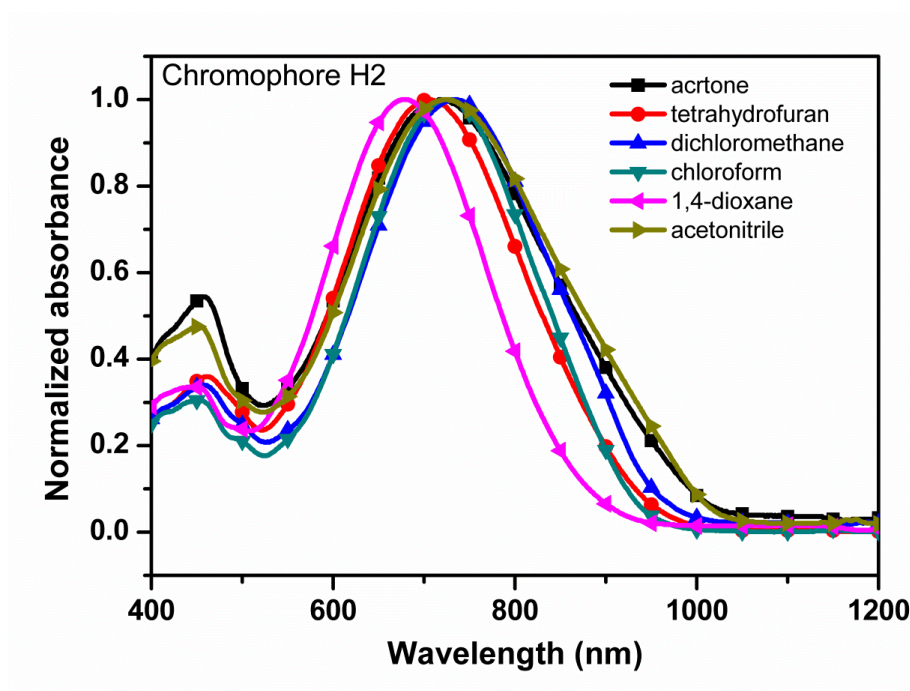

Figure S1 UV absorption spectra of chromophore H2 in six different solvents

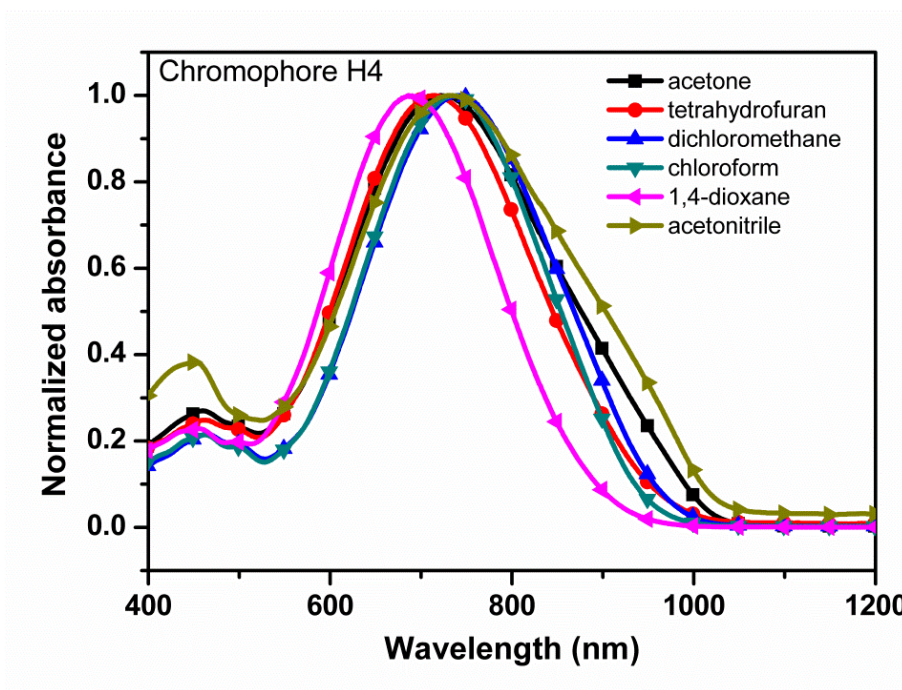

Figure S2 UV absorption spectra of chromophore H4 in six different solvents

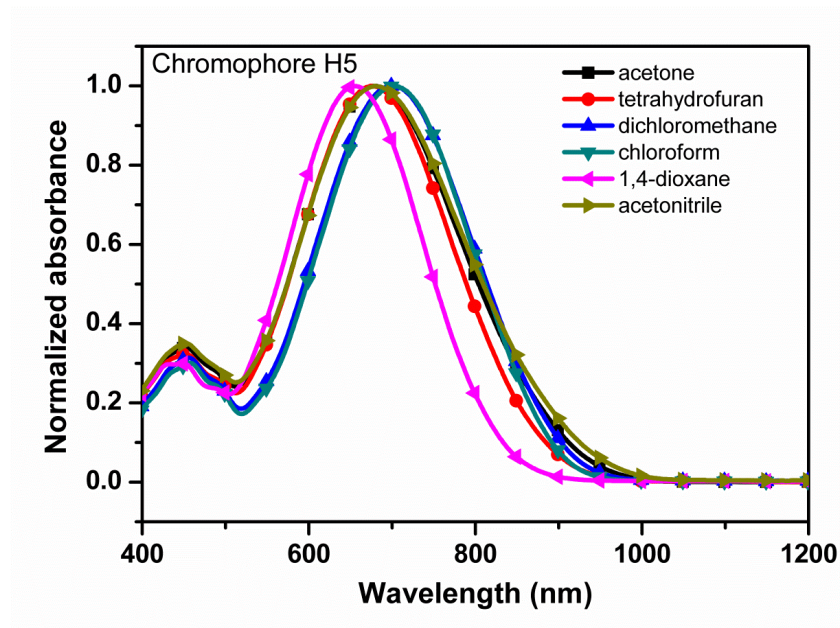

Figure S3 UV absorption spectra of chromophore H5 in six different solvents

## 2. Theoretical calculations

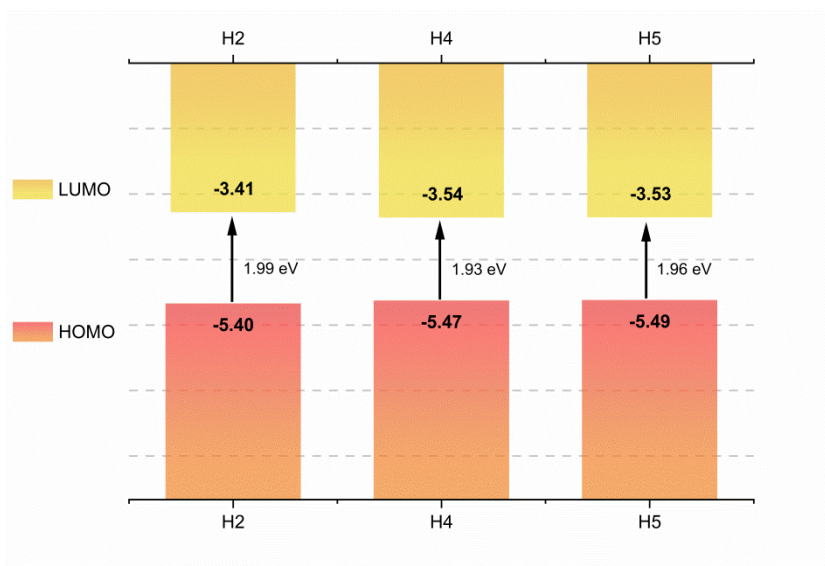

Figure S4 HOMO-LUMO energy gap  $\Delta E$  for chromophores H2, H4, and H5

## 3. $^1\text{H}$ and $^{13}\text{C}$ NMR spectra

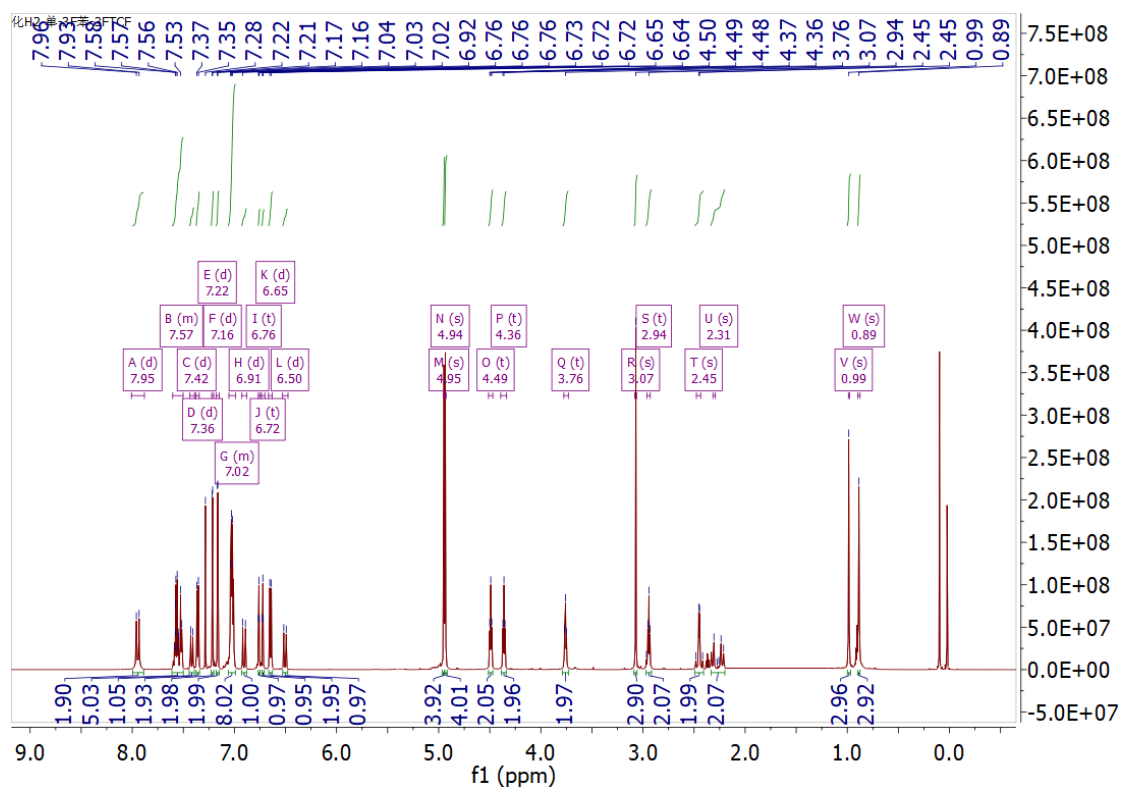

Figure S5  $^1\text{H}$  NMR spectra of chromophore H2

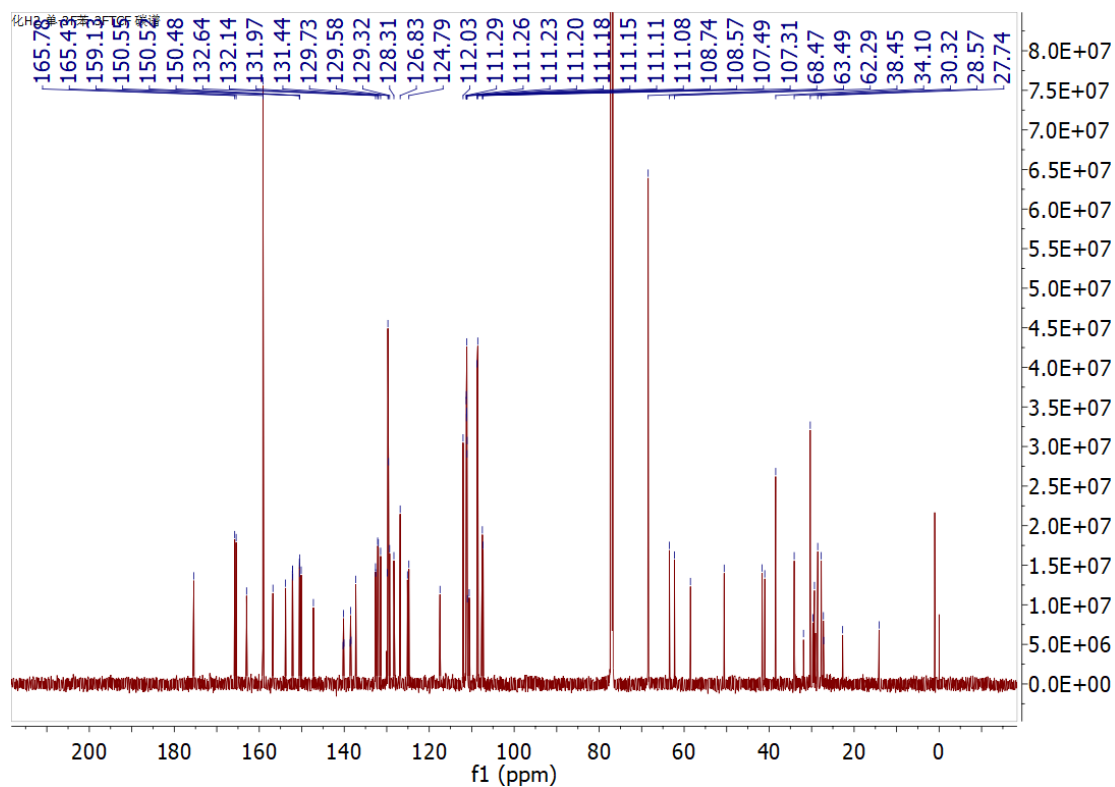

Figure S6  $^{13}\text{C}$  NMR spectra of chromophore H2

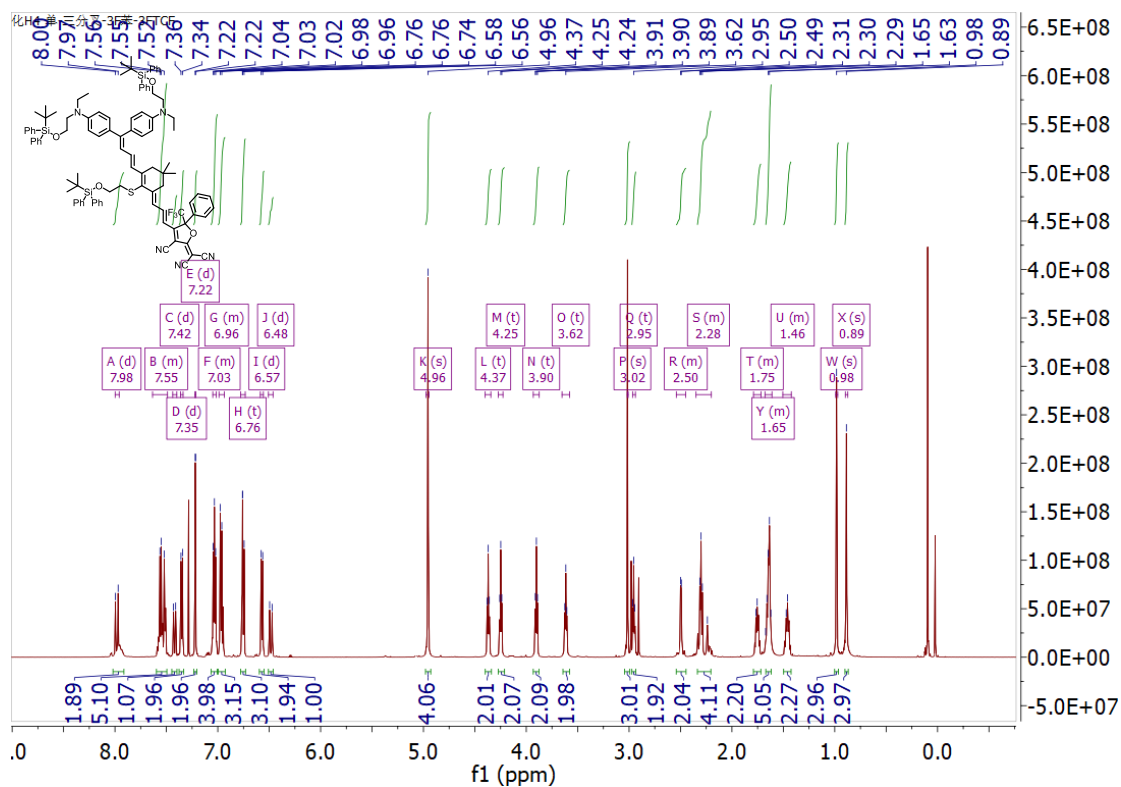

Figure S7  $^1\text{H}$  NMR spectra of chromophore H4

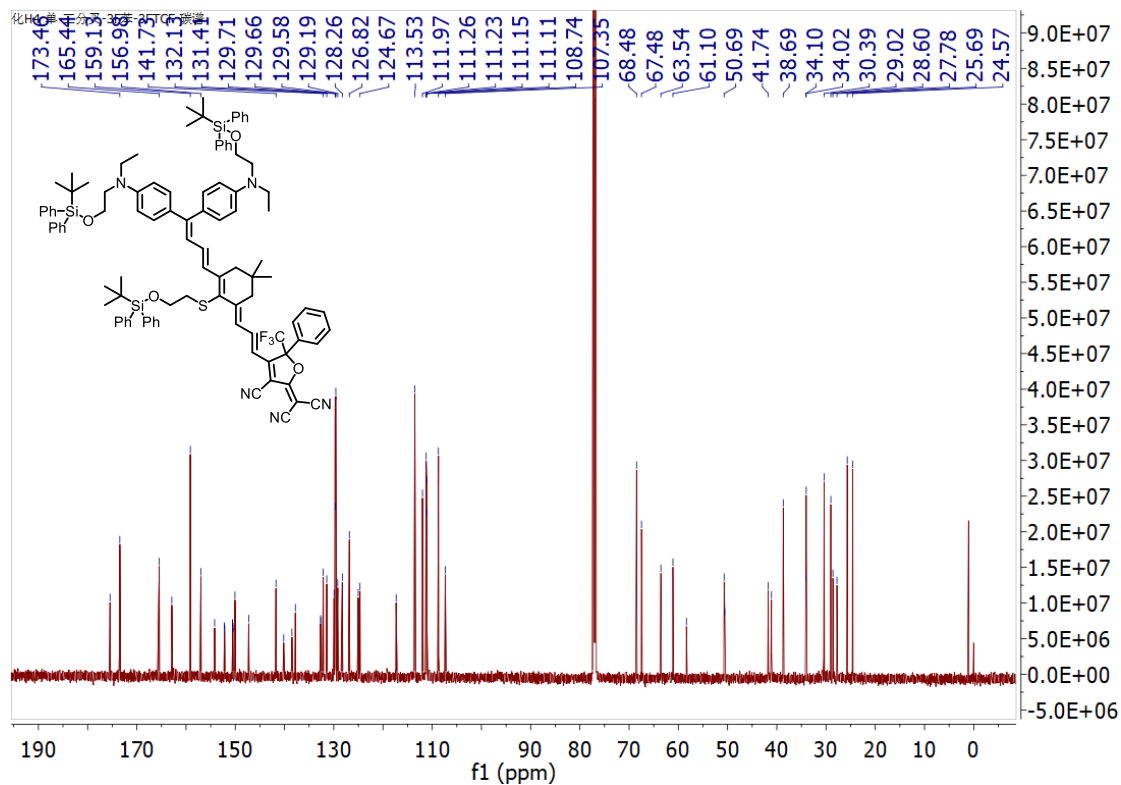

Figure S8  $^{13}\text{C}$  NMR spectra of chromophore H4

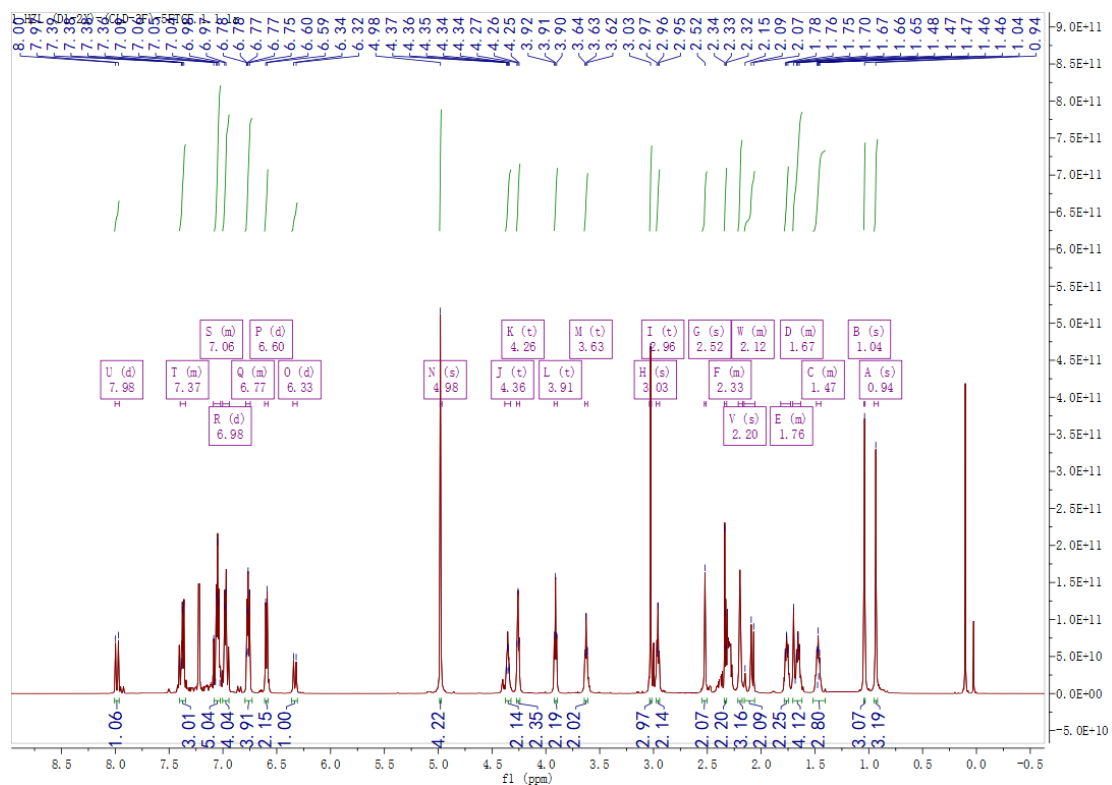

Figure S9  $^1\text{H}$  NMR spectra of chromophore H5

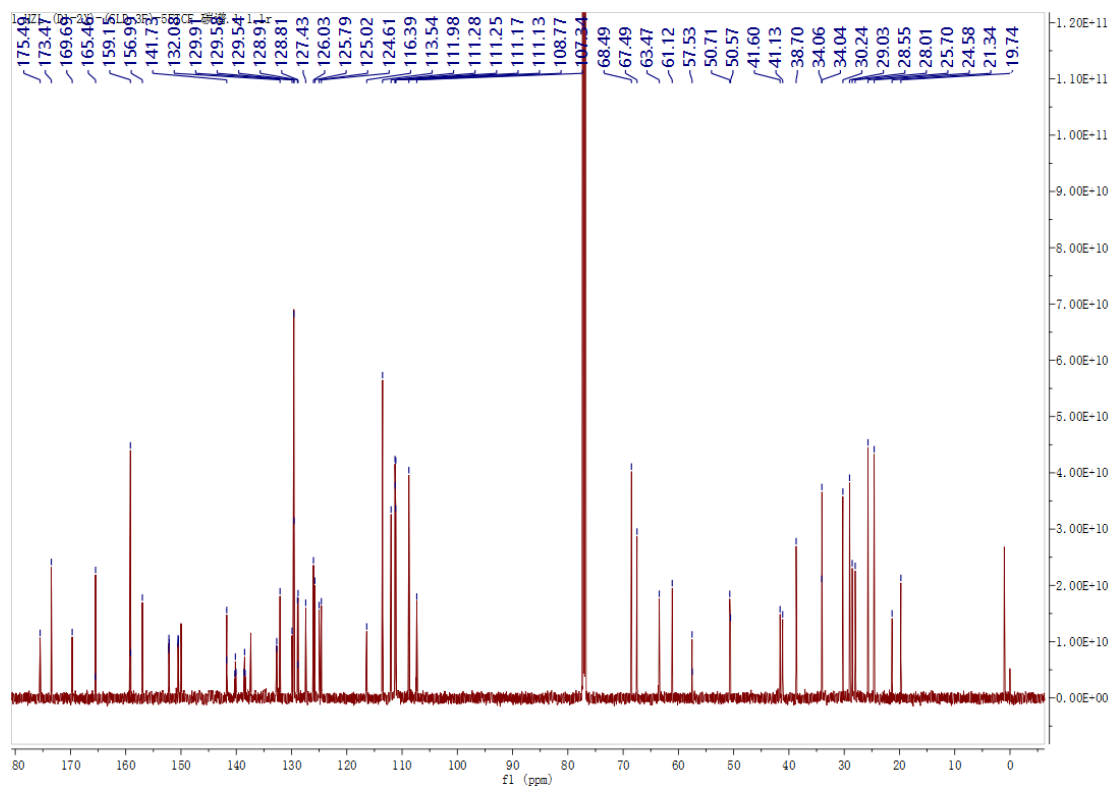

**Figure S10**  $^{13}\text{C}$  NMR spectra of chromophore **H5**
